# Supplementary material
Source: Springer Nature journal article supplement (https://www.springermedizin.de/resource/supplementary/12985_2010_1005_MOESM3_ESM.pdf/9608930)

# growth curve from BTV reassortants on BSR cells

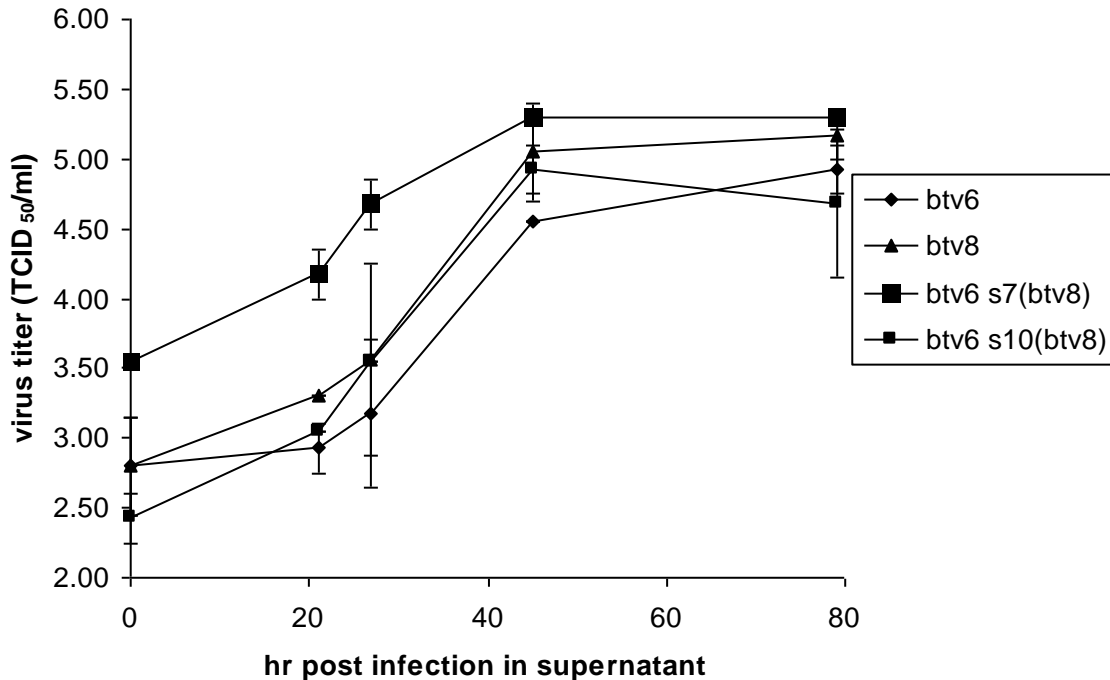

Supplement: MOESM3 [file 9608930]
